# Supplementary material for: Light-driven charge transfer in nano-Fe(iii) complexes facilitates the oxidation of water
Source: Royal Society of Chemistry journal article supplement (doi:10.1039/c6nj00121a), 2016-01-01
Supplement: c6nj00121a1.pdf [file c6nj00121a1.pdf]

## Support information

### Light driven charge transfer in nano-Fe(III) complexes facilitates water oxidation

Yin-Bing Wang,<sup>a</sup> Ling-Ling Qu<sup>a</sup>, Qiu-Yun Chen,<sup>a,\*</sup> Chang-Jian Feng<sup>b</sup>

<sup>a</sup> School of Chemistry and Chemical Engineering, Jiangsu University, 212013, China.

<sup>b</sup> College of Pharmacy, University of New Mexico, Albuquerque, New Mexico 87131, USA

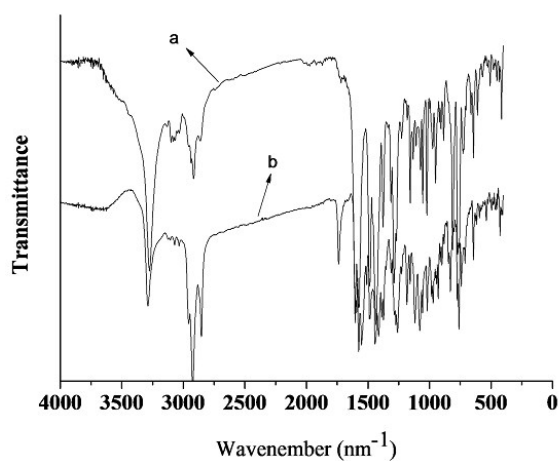

**Figure S1.** IR spectra of PPM@Fe (a) and BODIPY@Fe<sub>1</sub> (b).

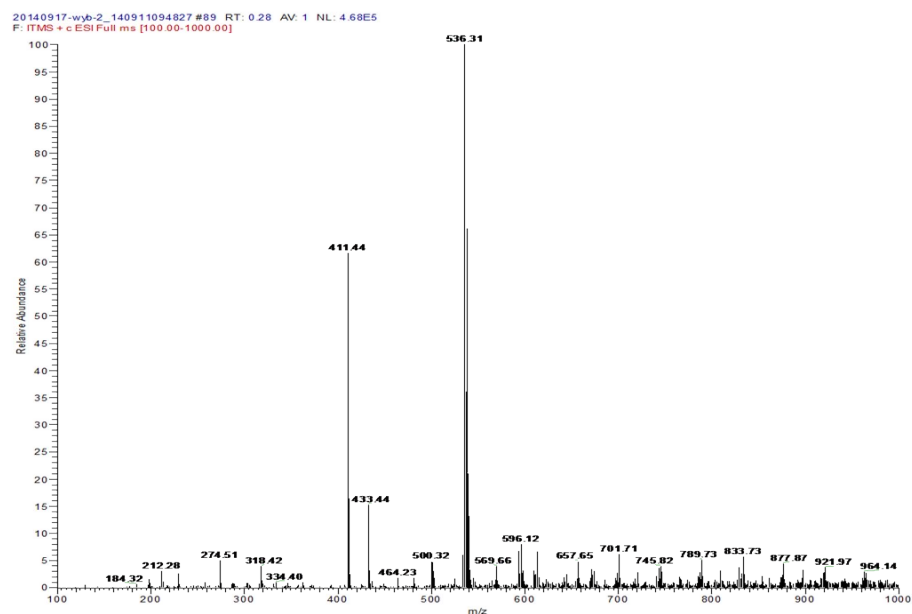

**Figure S2.** MS of PPM@Fe in MeCN. The main peak at  $m/z=536.31$  corresponds to  $[(\text{PPMdpa})\text{Fe}(\text{Cl})_2]^+$ , indicating the ratio of PPMdpa : Fe in PPM@Fe is 1:1. The peak at  $m/z = 411.44$  corresponds to  $[(\text{PPMdpa})\text{H}]^+$ .

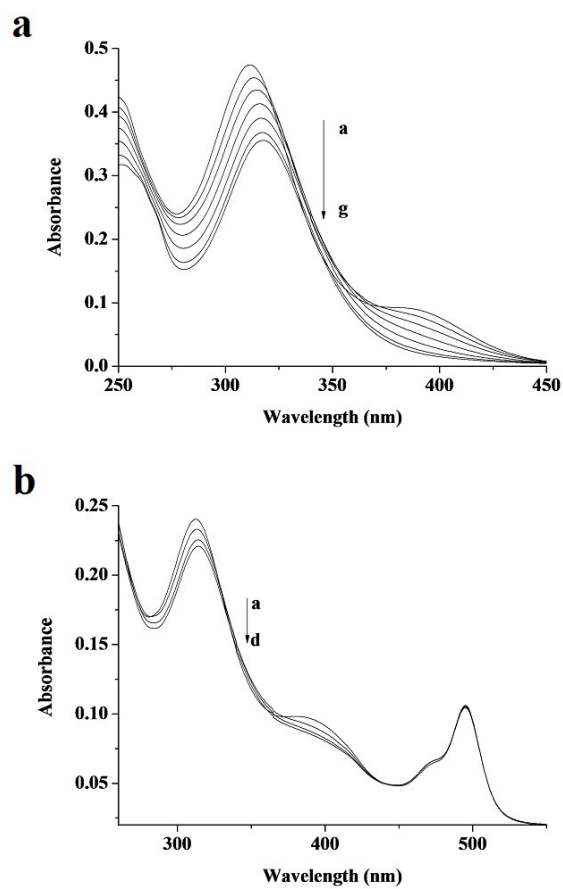

**Figure S3.** a) UV-vis absorption spectra of PPM@Fe (20 μM, MeCN) in the presence of various amount of H<sub>2</sub>O (a – g, C<sub>H<sub>2</sub>O</sub> = 0, 0.28, 0.56, 0.83, 1.1, 1.39, 1.67 M). b) UV-vis absorption spectra of BODIPY@Fe (10 μM, MeCN) in the presence of various amount of H<sub>2</sub>O (a – d, C<sub>H<sub>2</sub>O</sub> = 0, 0.56, 1.11, 1.67 M).
